# Supplementary material for: The Subjective Experience of Ageism: The Perceived Ageism Questionnaire (PAQ)
Source: MDPI journal article supplement (doi:10.3390/ijerph19148792), 2022-07-19
Supplement: s1 [file s1]

### SUPPLEMENT S3: Path-analysis (Lavaan Code)

```
modelPAQ8 <- "  
  #Regressions  
  APQ1 ~ a1 * NEG8 + a11 * POS8  
  APQ2 ~ a2 * NEG8 + a21 * POS8  
  APQ3 ~ a3 * NEG8 + a31 * POS8  
  APQ4 ~ a4 * NEG8 + a41 * POS8  
  APQ5 ~ a5 * NEG8 + a51 * POS8  
  APQ6 ~ a6 * NEG8 + a61 * POS8  
  APQ7.1 ~ a7 * NEG8 + a71 * POS8  
  
  #Covariances mediators  
  APQ1 ~~ APQ2  
  APQ1 ~~ APQ3  
  APQ1 ~~ APQ4  
  APQ1 ~~ APQ5  
  APQ1 ~~ APQ6  
  APQ1 ~~ APQ7.1  
  
  APQ2 ~~ APQ3  
  APQ2 ~~ APQ4  
  APQ2 ~~ APQ5  
  APQ2 ~~ APQ6  
  APQ2 ~~ APQ7.1  
  
  APQ3 ~~ APQ4  
  APQ3 ~~ APQ5  
  APQ3 ~~ APQ6  
  APQ3 ~~ APQ7.1  
  
  APQ4 ~~ APQ5
```

APQ4 ~~ APQ6

APQ4 ~~ APQ7.1

APQ5 ~~ APQ6

APQ5 ~~ APQ7.1

APQ6 ~~ APQ7.1

#Outcome variables

QOL ~ cp \* NEG8 + cp1 \* POS8 + c(b1) \* APQ1 + c(b2) \* APQ2 + c(b3) \* APQ3 + c(b4) \* APQ4 + c(b5) \* APQ5 + c(b6) \* APQ6 + c(b7) \* APQ7.1

MWB ~ cp2 \* NEG8 + cp21 \* POS8 + c(c1) \* APQ1 + c(c2) \* APQ2 + c(c3) \* APQ3 + c(c4) \* APQ4 + c(c5) \* APQ5 + c(c6) \* APQ6 + c(c7) \* APQ7.1

DEP ~ cp3 \* NEG8 + cp31 \* POS8 + c(d1) \* APQ1 + c(d2) \* APQ2 + c(d3) \* APQ3 + c(d4) \* APQ4 + c(d5) \* APQ5 + c(d6) \* APQ6 + c(d7) \* APQ7.1

ANX ~ cp4 \* NEG8 + cp41 \* POS8 + c(e1) \* APQ1 + c(e2) \* APQ2 + c(e3) \* APQ3 + c(e4) \* APQ4 + c(e5) \* APQ5 + c(e6) \* APQ6 + c(e7) \* APQ7.1

LS ~ cp5 \* NEG8 + cp51 \* POS8 + c(f1) \* APQ1 + c(f2) \* APQ2 + c(f3) \* APQ3 + c(f4) \* APQ4 + c(f5) \* APQ5 + c(f6) \* APQ6 + c(f7) \* APQ7.1

PSS ~ cp6 \* NEG8 + cp61 \* POS8 + c(g1) \* APQ1 + c(g2) \* APQ2 + c(g3) \* APQ3 + c(g4) \* APQ4 + c(g5) \* APQ5 + c(g6) \* APQ6 + c(g7) \* APQ7.1

#Defined effects:

total\_indirect\_NEG\_APQ\_QoL := a1 \* b1 + a2 \* b2 + a3 \* b3 + a4 \* b4 + a5 \* b5 + a6 \* b6 + a7 \* b7

total\_indirect\_NEG\_APQ\_MWB := a1 \* c1 + a2 \* c2 + a3 \* c3 + a4 \* c4 + a5 \* c5 + a6 \* c6 + a7 \* c7

total\_indirect\_NEG\_APQ\_DEP := a1 \* d1 + a2 \* d2 + a3 \* d3 + a4 \* d4 + a5 \* d5 + a6 \* d6 + a7 \* d7

total\_indirect\_NEG\_APQ\_ANX := a1 \* e1 + a2 \* e2 + a3 \* e3 + a4 \* e4 + a5 \* e5 + a6 \* e6 + a7 \* e7

total\_indirect\_NEG\_APQ\_LS := a1 \* f1 + a2 \* f2 + a3 \* f3 + a4 \* f4 + a5 \* f5 + a6 \* f6 + a7 \* f7

total\_indirect\_NEG\_APQ\_PSS := a1 \* g1 + a2 \* g2 + a3 \* g3 + a4 \* g4 + a5 \* g5 + a6 \* g6 + a7 \* g7

```
total_indirect_POS_APQ_QoL := a11 * b1 + a21 * b2 + a31 * b3 + a41 * b4 +
a51 * b5 + a61 * b6 + a71 * b7
```

```
total_indirect_POS_APQ_MWB := a11 * c1 + a21 * c2 + a31 * c3 + a41 * c4 +
a51 * c5 + a61 * c6 + a71 * c7
```

```
total_indirect_POS_APQ_DEP := a11 * d1 + a21 * d2 + a31 * d3 + a41 * d4 +
a51 * d5 + a61 * d6 + a71 * d7
```

```
total_indirect_POS_APQ_ANX := a11 * e1 + a21 * e2 + a31 * e3 + a41 * e4 +
a51 * e5 + a61 * e6 + a71 * e7
```

```
total_indirect_POS_APQ_LS := a11 * f1 + a21 * f2 + a31 * f3 + a41 * f4 +
a51 * f5 + a61 * f6 + a71 * f7
```

```
total_indirect_POS_APQ_PSS := a11 * g1 + a21 * g2 + a31 * g3 + a41 * g4 +
a51 * g5 + a61 * g6 + a71 * g7
```

```
"
```

```
fit <- lavaan::sem(model = modelPAQ8,data = DATA_PAQ_OUT2, se = "boot",
bootstrap = 5000)
```

```
summary(fit, ci = TRUE)
```

```
save(fit, file = "fit_Output_path_analysis_revision.Rdata")
```

```
> summary(fit, ci = TRUE)
```

lavaan 0.6-11 ended normally after 214 iterations

|                            |        |
|----------------------------|--------|
| Estimator                  | ML     |
| Optimization method        | NLMINB |
| Number of model parameters | 117    |
| Number of observations     | 500    |

Model Test User Model:

|                    |       |
|--------------------|-------|
| Test statistic     | 0.000 |
| Degrees of freedom | 0     |

Parameter Estimates:

|                                      |           |
|--------------------------------------|-----------|
| Standard errors                      | Bootstrap |
| Number of requested bootstrap draws  | 5000      |
| Number of successful bootstrap draws | 5000      |

Regressions:

|          |       | Estimate | Std.Err | z-value | P(> z ) | ci.lower | ci.upper |
|----------|-------|----------|---------|---------|---------|----------|----------|
| APQ1 ~   |       |          |         |         |         |          |          |
| NEG8     | (a1)  | 0.139    | 0.040   | 3.490   | 0.000   | 0.059    | 0.219    |
| POS8     | (a11) | 0.030    | 0.046   | 0.647   | 0.518   | -0.058   | 0.122    |
| APQ2 ~   |       |          |         |         |         |          |          |
| NEG8     | (a2)  | 0.304    | 0.041   | 7.477   | 0.000   | 0.223    | 0.380    |
| POS8     | (a21) | -0.154   | 0.043   | -3.537  | 0.000   | -0.238   | -0.067   |
| APQ3 ~   |       |          |         |         |         |          |          |
| NEG8     | (a3)  | -0.065   | 0.029   | -2.208  | 0.027   | -0.123   | -0.008   |
| POS8     | (a31) | 0.169    | 0.037   | 4.592   | 0.000   | 0.095    | 0.238    |
| APQ4 ~   |       |          |         |         |         |          |          |
| NEG8     | (a4)  | 0.240    | 0.043   | 5.621   | 0.000   | 0.156    | 0.321    |
| POS8     | (a41) | -0.098   | 0.049   | -1.999  | 0.046   | -0.191   | 0.001    |
| APQ5 ~   |       |          |         |         |         |          |          |
| NEG8     | (a5)  | 0.256    | 0.037   | 6.977   | 0.000   | 0.182    | 0.326    |
| POS8     | (a51) | -0.114   | 0.034   | -3.341  | 0.001   | -0.182   | -0.047   |
| APQ6 ~   |       |          |         |         |         |          |          |
| NEG8     | (a6)  | -0.062   | 0.029   | -2.123  | 0.034   | -0.120   | -0.005   |
| POS8     | (a61) | 0.103    | 0.035   | 2.947   | 0.003   | 0.032    | 0.171    |
| APQ7.1 ~ |       |          |         |         |         |          |          |
| NEG8     | (a7)  | 0.118    | 0.036   | 3.280   | 0.001   | 0.049    | 0.191    |
| POS8     | (a71) | -0.064   | 0.037   | -1.704  | 0.088   | -0.136   | 0.010    |
| QOL ~    |       |          |         |         |         |          |          |
| NEG8     | (cp)  | -0.678   | 0.135   | -5.037  | 0.000   | -0.952   | -0.422   |

|        |        |        |       |        |       |        |        |
|--------|--------|--------|-------|--------|-------|--------|--------|
| POS8   | (cp1)  | 0.299  | 0.153 | 1.954  | 0.051 | -0.006 | 0.591  |
| APQ1   | (b1)   | 0.036  | 0.159 | 0.228  | 0.820 | -0.274 | 0.349  |
| APQ2   | (b2)   | -0.817 | 0.201 | -4.060 | 0.000 | -1.210 | -0.421 |
| APQ3   | (b3)   | 0.453  | 0.239 | 1.897  | 0.058 | -0.003 | 0.922  |
| APQ4   | (b4)   | -0.722 | 0.188 | -3.842 | 0.000 | -1.093 | -0.353 |
| APQ5   | (b5)   | -0.810 | 0.244 | -3.320 | 0.001 | -1.299 | -0.327 |
| APQ6   | (b6)   | 0.932  | 0.239 | 3.895  | 0.000 | 0.457  | 1.388  |
| APQ7.1 | (b7)   | -0.025 | 0.179 | -0.140 | 0.889 | -0.372 | 0.335  |
| MWB ~  |        |        |       |        |       |        |        |
| NEG8   | (cp2)  | -0.200 | 0.104 | -1.926 | 0.054 | -0.402 | 0.007  |
| POS8   | (cp21) | 0.479  | 0.106 | 4.523  | 0.000 | 0.268  | 0.685  |
| APQ1   | (c1)   | 0.333  | 0.111 | 2.995  | 0.003 | 0.119  | 0.558  |
| APQ2   | (c2)   | -0.645 | 0.145 | -4.451 | 0.000 | -0.938 | -0.366 |
| APQ3   | (c3)   | 0.429  | 0.161 | 2.661  | 0.008 | 0.124  | 0.749  |
| APQ4   | (c4)   | -0.118 | 0.134 | -0.877 | 0.381 | -0.381 | 0.140  |
| APQ5   | (c5)   | -0.221 | 0.159 | -1.392 | 0.164 | -0.539 | 0.089  |
| APQ6   | (c6)   | 0.368  | 0.150 | 2.445  | 0.014 | 0.072  | 0.657  |
| APQ7.1 | (c7)   | -0.219 | 0.133 | -1.650 | 0.099 | -0.485 | 0.040  |
| DEP ~  |        |        |       |        |       |        |        |
| NEG8   | (cp3)  | 0.309  | 0.087 | 3.572  | 0.000 | 0.143  | 0.479  |
| POS8   | (cp31) | -0.313 | 0.083 | -3.778 | 0.000 | -0.473 | -0.146 |
| APQ1   | (d1)   | -0.066 | 0.087 | -0.753 | 0.452 | -0.235 | 0.105  |
| APQ2   | (d2)   | 0.492  | 0.108 | 4.564  | 0.000 | 0.287  | 0.713  |
| APQ3   | (d3)   | 0.081  | 0.110 | 0.740  | 0.459 | -0.133 | 0.295  |
| APQ4   | (d4)   | 0.137  | 0.102 | 1.347  | 0.178 | -0.060 | 0.340  |
| APQ5   | (d5)   | 0.314  | 0.120 | 2.605  | 0.009 | 0.071  | 0.548  |
| APQ6   | (d6)   | -0.190 | 0.104 | -1.834 | 0.067 | -0.390 | 0.014  |
| APQ7.1 | (d7)   | -0.057 | 0.104 | -0.548 | 0.584 | -0.262 | 0.149  |
| ANX ~  |        |        |       |        |       |        |        |
| NEG8   | (cp4)  | 0.236  | 0.068 | 3.459  | 0.001 | 0.105  | 0.374  |
| POS8   | (cp41) | -0.190 | 0.061 | -3.126 | 0.002 | -0.310 | -0.071 |
| APQ1   | (e1)   | -0.009 | 0.063 | -0.140 | 0.888 | -0.135 | 0.113  |

|        |        |        |       |        |       |        |        |
|--------|--------|--------|-------|--------|-------|--------|--------|
| APQ2   | (e2)   | 0.322  | 0.080 | 4.017  | 0.000 | 0.168  | 0.482  |
| APQ3   | (e3)   | 0.083  | 0.076 | 1.098  | 0.272 | -0.067 | 0.233  |
| APQ4   | (e4)   | -0.050 | 0.076 | -0.658 | 0.510 | -0.199 | 0.096  |
| APQ5   | (e5)   | 0.351  | 0.095 | 3.701  | 0.000 | 0.161  | 0.540  |
| APQ6   | (e6)   | -0.110 | 0.078 | -1.412 | 0.158 | -0.263 | 0.040  |
| APQ7.1 | (e7)   | -0.161 | 0.080 | -2.008 | 0.045 | -0.323 | -0.003 |
| LS ~   |        |        |       |        |       |        |        |
| NEG8   | (cp5)  | 0.152  | 0.052 | 2.919  | 0.004 | 0.053  | 0.257  |
| POS8   | (cp51) | -0.209 | 0.057 | -3.692 | 0.000 | -0.319 | -0.099 |
| APQ1   | (f1)   | -0.079 | 0.059 | -1.352 | 0.176 | -0.191 | 0.038  |
| APQ2   | (f2)   | 0.106  | 0.072 | 1.468  | 0.142 | -0.035 | 0.246  |
| APQ3   | (f3)   | -0.039 | 0.085 | -0.459 | 0.646 | -0.203 | 0.136  |
| APQ4   | (f4)   | 0.082  | 0.068 | 1.195  | 0.232 | -0.055 | 0.218  |
| APQ5   | (f5)   | 0.253  | 0.095 | 2.665  | 0.008 | 0.066  | 0.444  |
| APQ6   | (f6)   | -0.066 | 0.089 | -0.740 | 0.459 | -0.241 | 0.111  |
| APQ7.1 | (f7)   | 0.020  | 0.073 | 0.280  | 0.779 | -0.123 | 0.163  |
| PSS ~  |        |        |       |        |       |        |        |
| NEG8   | (cp6)  | 0.365  | 0.097 | 3.749  | 0.000 | 0.176  | 0.560  |
| POS8   | (cp61) | -0.067 | 0.099 | -0.676 | 0.499 | -0.260 | 0.131  |
| APQ1   | (g1)   | -0.000 | 0.098 | -0.005 | 0.996 | -0.195 | 0.196  |
| APQ2   | (g2)   | 0.543  | 0.121 | 4.477  | 0.000 | 0.311  | 0.785  |
| APQ3   | (g3)   | -0.034 | 0.138 | -0.245 | 0.807 | -0.309 | 0.239  |
| APQ4   | (g4)   | -0.066 | 0.114 | -0.576 | 0.565 | -0.287 | 0.165  |
| APQ5   | (g5)   | 0.456  | 0.136 | 3.359  | 0.001 | 0.180  | 0.720  |
| APQ6   | (g6)   | -0.315 | 0.130 | -2.419 | 0.016 | -0.565 | -0.062 |
| APQ7.1 | (g7)   | -0.191 | 0.122 | -1.570 | 0.116 | -0.427 | 0.049  |

Covariances:

|          | Estimate | Std.Err | z-value | P(> z ) | ci.lower | ci.upper |
|----------|----------|---------|---------|---------|----------|----------|
| .APQ1 ~~ |          |         |         |         |          |          |
| .APQ2    | 2.122    | 0.266   | 7.968   | 0.000   | 1.598    | 2.649    |
| .APQ3    | -0.568   | 0.215   | -2.635  | 0.008   | -0.995   | -0.147   |

|          |         |       |        |       |         |        |
|----------|---------|-------|--------|-------|---------|--------|
| .APQ4    | 2.100   | 0.275 | 7.651  | 0.000 | 1.557   | 2.626  |
| .APQ5    | 1.047   | 0.208 | 5.036  | 0.000 | 0.627   | 1.449  |
| .APQ6    | -0.397  | 0.186 | -2.135 | 0.033 | -0.765  | -0.026 |
| .APQ7.1  | 0.959   | 0.202 | 4.741  | 0.000 | 0.555   | 1.348  |
| .APQ2 ~~ |         |       |        |       |         |        |
| .APQ3    | -0.705  | 0.183 | -3.846 | 0.000 | -1.072  | -0.346 |
| .APQ4    | 2.736   | 0.245 | 11.168 | 0.000 | 2.240   | 3.204  |
| .APQ5    | 2.148   | 0.193 | 11.135 | 0.000 | 1.763   | 2.522  |
| .APQ6    | -0.548  | 0.184 | -2.979 | 0.003 | -0.904  | -0.186 |
| .APQ7.1  | 0.924   | 0.210 | 4.398  | 0.000 | 0.508   | 1.332  |
| .APQ3 ~~ |         |       |        |       |         |        |
| .APQ4    | -0.919  | 0.195 | -4.712 | 0.000 | -1.295  | -0.531 |
| .APQ5    | -0.724  | 0.154 | -4.703 | 0.000 | -1.022  | -0.418 |
| .APQ6    | 0.559   | 0.135 | 4.128  | 0.000 | 0.290   | 0.822  |
| .APQ7.1  | -0.631  | 0.153 | -4.120 | 0.000 | -0.923  | -0.323 |
| .APQ4 ~~ |         |       |        |       |         |        |
| .APQ5    | 1.447   | 0.207 | 7.001  | 0.000 | 1.038   | 1.840  |
| .APQ6    | -1.092  | 0.194 | -5.618 | 0.000 | -1.465  | -0.712 |
| .APQ7.1  | 1.652   | 0.240 | 6.897  | 0.000 | 1.173   | 2.128  |
| .APQ5 ~~ |         |       |        |       |         |        |
| .APQ6    | -0.874  | 0.162 | -5.403 | 0.000 | -1.194  | -0.556 |
| .APQ7.1  | 0.971   | 0.168 | 5.779  | 0.000 | 0.640   | 1.298  |
| .APQ6 ~~ |         |       |        |       |         |        |
| .APQ7.1  | -0.981  | 0.156 | -6.279 | 0.000 | -1.276  | -0.678 |
| .QOL ~~  |         |       |        |       |         |        |
| .MWB     | 16.356  | 1.875 | 8.721  | 0.000 | 12.372  | 19.754 |
| .DEP     | -10.975 | 1.355 | -8.099 | 0.000 | -13.413 | -8.096 |
| .ANX     | -5.129  | 0.958 | -5.354 | 0.000 | -6.928  | -3.185 |
| .LS      | -8.823  | 0.997 | -8.850 | 0.000 | -10.658 | -6.665 |
| .PSS     | -8.992  | 1.518 | -5.924 | 0.000 | -11.755 | -5.790 |
| .MWB ~~  |         |       |        |       |         |        |
| .DEP     | -9.342  | 1.063 | -8.790 | 0.000 | -11.314 | -7.140 |

|         |        |       |        |       |         |        |
|---------|--------|-------|--------|-------|---------|--------|
| .ANX    | -4.907 | 0.706 | -6.954 | 0.000 | -6.169  | -3.442 |
| .LS     | -4.235 | 0.694 | -6.101 | 0.000 | -5.527  | -2.773 |
| .PSS    | -9.090 | 1.092 | -8.326 | 0.000 | -11.056 | -6.824 |
| .DEP ~~ |        |       |        |       |         |        |
| .ANX    | 5.812  | 0.664 | 8.757  | 0.000 | 4.406   | 6.995  |
| .LS     | 3.013  | 0.524 | 5.745  | 0.000 | 1.918   | 4.000  |
| .PSS    | 7.738  | 0.892 | 8.676  | 0.000 | 5.865   | 9.321  |
| .ANX ~~ |        |       |        |       |         |        |
| .LS     | 0.921  | 0.362 | 2.548  | 0.011 | 0.212   | 1.629  |
| .PSS    | 7.202  | 0.802 | 8.981  | 0.000 | 5.523   | 8.683  |
| .LS ~~  |        |       |        |       |         |        |
| .PSS    | 1.702  | 0.559 | 3.044  | 0.002 | 0.557   | 2.765  |

#### Variances:

|         | Estimate | Std.Err | z-value | P(> z ) | ci.lower | ci.upper |
|---------|----------|---------|---------|---------|----------|----------|
| .APQ1   | 5.625    | 0.318   | 17.689  | 0.000   | 4.956    | 6.211    |
| .APQ2   | 5.071    | 0.284   | 17.834  | 0.000   | 4.490    | 5.618    |
| .APQ3   | 3.145    | 0.256   | 12.279  | 0.000   | 2.650    | 3.660    |
| .APQ4   | 5.388    | 0.316   | 17.055  | 0.000   | 4.739    | 5.979    |
| .APQ5   | 3.325    | 0.226   | 14.695  | 0.000   | 2.879    | 3.758    |
| .APQ6   | 2.775    | 0.197   | 14.117  | 0.000   | 2.387    | 3.145    |
| .APQ7.1 | 3.574    | 0.212   | 16.827  | 0.000   | 3.148    | 3.985    |
| .QOL    | 48.291   | 3.163   | 15.270  | 0.000   | 41.048   | 53.399   |
| .MWB    | 24.858   | 1.802   | 13.796  | 0.000   | 21.006   | 27.989   |
| .DEP    | 14.866   | 1.222   | 12.165  | 0.000   | 12.220   | 17.034   |
| .ANX    | 7.975    | 0.619   | 12.874  | 0.000   | 6.609    | 9.035    |
| .LS     | 7.545    | 0.508   | 14.861  | 0.000   | 6.394    | 8.401    |
| .PSS    | 21.539   | 1.587   | 13.568  | 0.000   | 18.095   | 24.361   |

#### Defined Parameters:

|                | Estimate | Std.Err | z-value | P(> z ) | ci.lower | ci.upper |
|----------------|----------|---------|---------|---------|----------|----------|
| tt__NEG_APQ_QL | -0.714   | 0.103   | -6.939  | 0.000   | -0.920   | -0.513   |



|                |        |       |        |       |        |        |
|----------------|--------|-------|--------|-------|--------|--------|
| t__NEG_APQ_MWB | -0.311 | 0.056 | -5.577 | 0.000 | -0.424 | -0.205 |
| t__NEG_APQ_DEP | 0.253  | 0.047 | 5.421  | 0.000 | 0.167  | 0.348  |
| t__NEG_APQ_ANX | 0.157  | 0.031 | 4.983  | 0.000 | 0.096  | 0.220  |
| tt__NEG_APQ_LS | 0.114  | 0.025 | 4.540  | 0.000 | 0.067  | 0.166  |
| t__NEG_APQ_PSS | 0.265  | 0.050 | 5.323  | 0.000 | 0.169  | 0.364  |
| tt__POS_APQ_QL | 0.463  | 0.114 | 4.048  | 0.000 | 0.236  | 0.687  |
| t__POS_APQ_MWB | 0.270  | 0.059 | 4.569  | 0.000 | 0.160  | 0.392  |
| t__POS_APQ_DEP | -0.129 | 0.041 | -3.184 | 0.001 | -0.211 | -0.052 |
| t__POS_APQ_ANX | -0.072 | 0.028 | -2.614 | 0.009 | -0.129 | -0.021 |
| tt__POS_APQ_LS | -0.070 | 0.023 | -2.986 | 0.003 | -0.118 | -0.026 |
| t__POS_APQ_PSS | -0.155 | 0.047 | -3.264 | 0.001 | -0.257 | -0.067 |
