# Supplementary material for: The Subjective Experience of Ageism: The Perceived Ageism Questionnaire (PAQ)
Source: MDPI journal article supplement (doi:10.3390/ijerph19148792), 2022-07-19
Supplement: s1 [file s1]

## SUPPLEMENT S1: Original Dutch version of the Perceived Ageism Questionnaire

De volgende vragen gaan over uw ervaringen met de manier waarop anderen u benaderen in het dagelijks leven. Geef telkens aan in hoeverre u onderstaande gevoelens het afgelopen jaar heeft gehad.

|   | Hoe vaak in het afgelopen jaar heeft u het gevoel gehad dat ..                                                                                             | Nooit                 | Zelden                | Soms                  | Vaak                  | Heel                  |
|---|------------------------------------------------------------------------------------------------------------------------------------------------------------|-----------------------|-----------------------|-----------------------|-----------------------|-----------------------|
| 1 | .. mensen u vanwege uw leeftijd benaderen alsof u een klein kind bent?                                                                                     | <input type="radio"/> |
| 2 | .. er niet naar u geluisterd wordt en/of uw mening/adviezen niet serieus genomen worden vanwege uw leeftijd?                                               | <input type="radio"/> |
| 3 | .. mensen uw adviezen en bijdrage aan een gesprek waarderen vanwege uw levenservaring?                                                                     | <input type="radio"/> |
| 4 | .. mensen negatieve vooroordelen of een overdreven stereotype beeldvorming (bijv. zwak, kwetsbaar, saai, langzaam) over u hebben vanwege uw leeftijd?      | <input type="radio"/> |
| 5 | .. mensen er vanwege uw leeftijd van uitgaan dat u wijs en verstandig bent?                                                                                | <input type="radio"/> |
| 6 | .. mensen u onterecht behandelden alsof u minder aankunt (geestelijk of fysiek) vanwege uw leeftijd?                                                       | <input type="radio"/> |
| 7 | .. mensen onterecht aannamen dat u niet goed kunt horen vanwege uw leeftijd?                                                                               | <input type="radio"/> |
| 8 | .. mensen vanwege uw leeftijd geringschattend denken (met weinig of geen waarde) over uw bijdrage aan de samenleving?                                      | <input type="radio"/> |
| 9 | .. mensen u juist vanwege uw leeftijd als betekenisvol onderdeel van de samenleving zien (bijv. oppassen op (klein)kinderen of vrijwilligersactiviteiten)? | <input type="radio"/> |

*Note.* Rows are color-coded to distinguish items pertaining to the negative (red) and positive (blue) subscale of the Perceived Ageism Questionnaire (PAQ). Item 7 was dropped from the final scale (PAQ-8) and is therefore colored grey.
