# Supplementary material for: The Subjective Experience of Ageism: The Perceived Ageism Questionnaire (PAQ)
Source: MDPI journal article supplement (doi:10.3390/ijerph19148792), 2022-07-19
Supplement: s1 [file s1]

## SUPPLEMENT S2: Supplementary Results

**Table S1.** Inter-item correlations for the PAQ items of Analysis 1 (vertical and Analysis 2 (Horizontal).

| 1 | 2 | 1     | 2     | 3     | 4     | 5     | 6     | 7    | 8      | 9     |
|---|---|-------|-------|-------|-------|-------|-------|------|--------|-------|
| 1 |   |       |       |       |       |       |       |      |        |       |
|   | 1 |       | 0.47  | 0.009 | 0.38  | −0.03 | 0.38  |      | 0.44   | 0.04  |
|   | 2 | 0.51  |       | 0.11  | 0.49  | 0.09  | 0.44  |      | 0.42   | 0.10  |
|   | 3 | −0.11 | −0.12 |       | 0.002 | 0.54  | −0.02 |      | −0.004 | 0.40  |
|   | 4 | 0.44  | 0.42  | −0.09 |       | 0.11  | 0.46  |      | 0.49   | 0.008 |
|   | 5 | −0.06 | −0.08 | 0.60  | −0.01 |       | 0.004 |      | 0.06   | 0.44  |
|   | 6 | 0.44  | 0.43  | −0.07 | 0.52  | 0.03  |       |      | 0.44   | 0.006 |
|   | 7 | 0.26  | 0.27  | 0.03  | 0.29  | 0.03  | 0.35  |      |        |       |
|   | 8 | 0.41  | 0.42  | −0.09 | 0.46  | −0.07 | 0.52  | 0.44 |        | 0.01  |
|   | 9 | −0.04 | 0.005 | 0.48  | −0.02 | 0.47  | 0.006 | 0.12 | −0.01  |       |

*Note.* Item 7 was removed from the matrix in Analysis 2, as a PAQ-8 was found to be reliable in Analysis 1.

**Table S2.** Standardized loadings for two-factor confirmatory model of the 8-item perceived ageism questionnaire (PAQ) – Analysis 2

| Item | Negative (NEG)        | Positive (POS)        |
|------|-----------------------|-----------------------|
|      | Standardized loadings | Standardized loadings |
| 1    | 0.61                  |                       |
| 2    | 0.69                  |                       |
| 3    |                       | 0.70                  |
| 4    | 0.70                  |                       |
| 5    |                       | 0.77                  |
| 6    | 0.63                  |                       |
| 7    |                       |                       |
| 8    | 0.67                  |                       |
| 9    |                       | 0.57                  |

*Note.* NEG: perceived negative ageism subscale, POS: perceived positive ageism subscale.

**Table S3.** Descriptives of perceived negative (NEG) and positive (POS) ageism per age group – Analysis 2

|                         |         | NEG  |      |           | POS  |      |           |
|-------------------------|---------|------|------|-----------|------|------|-----------|
|                         |         | M    | SD   | min - max | M    | SD   | min - max |
| Young-old ( $\leq 67$ ) | n = 263 | 6.09 | 2.37 | 5 – 16    | 9.32 | 2.36 | 3 – 15    |
| Old-old ( $> 67$ )      | n = 237 | 7.43 | 2.66 | 5 – 19    | 9.87 | 2.19 | 3 – 15    |

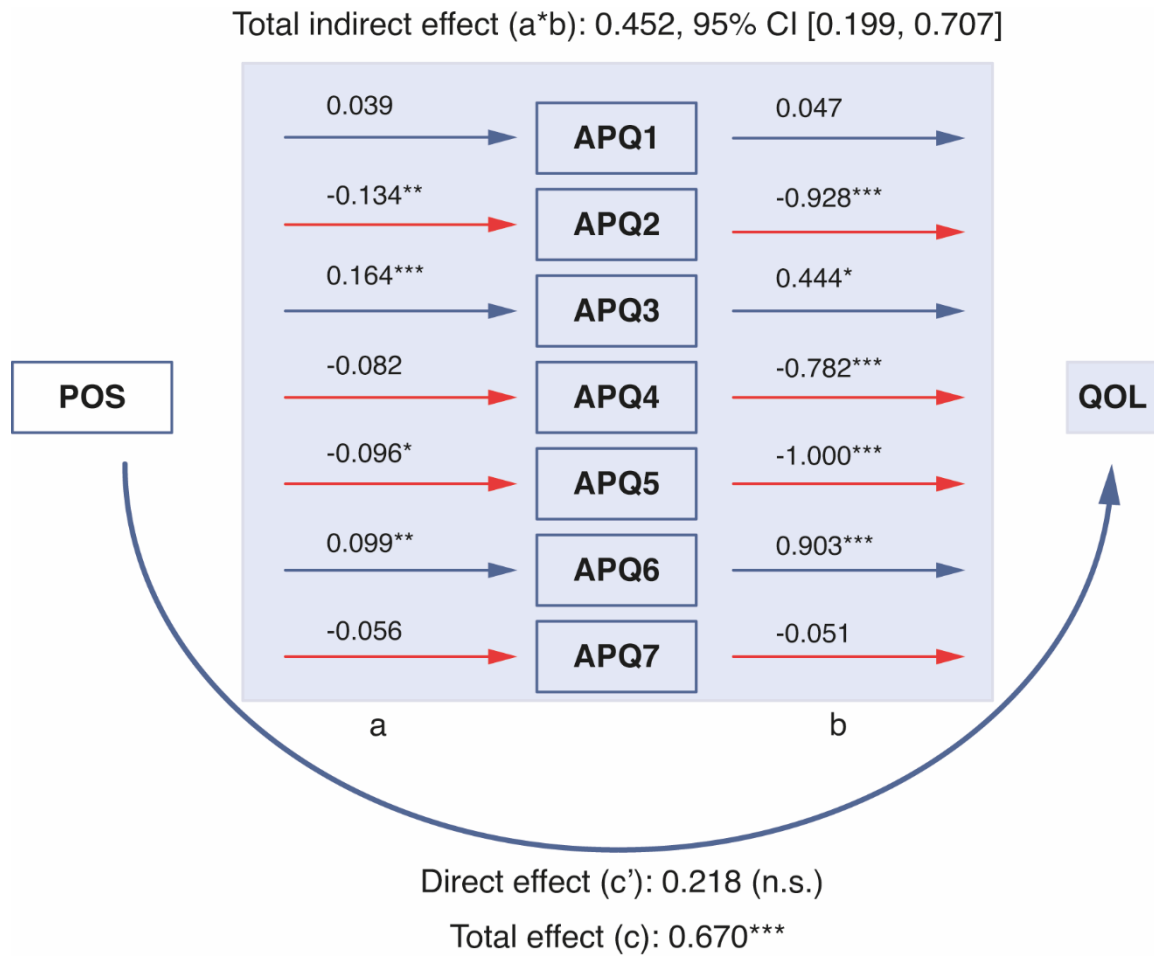

**Figure S1.** Mediation Diagram for the Relationship Between Positive (POS) Perceived Ageism and Quality of Life (QOL) as Mediated by Self-perceptions of Aging (APQ)

Note. Values represent unstandardized regression coefficients. \* $p < .05$ , \*\* $p < .01$ , \*\*\* $p < .001$

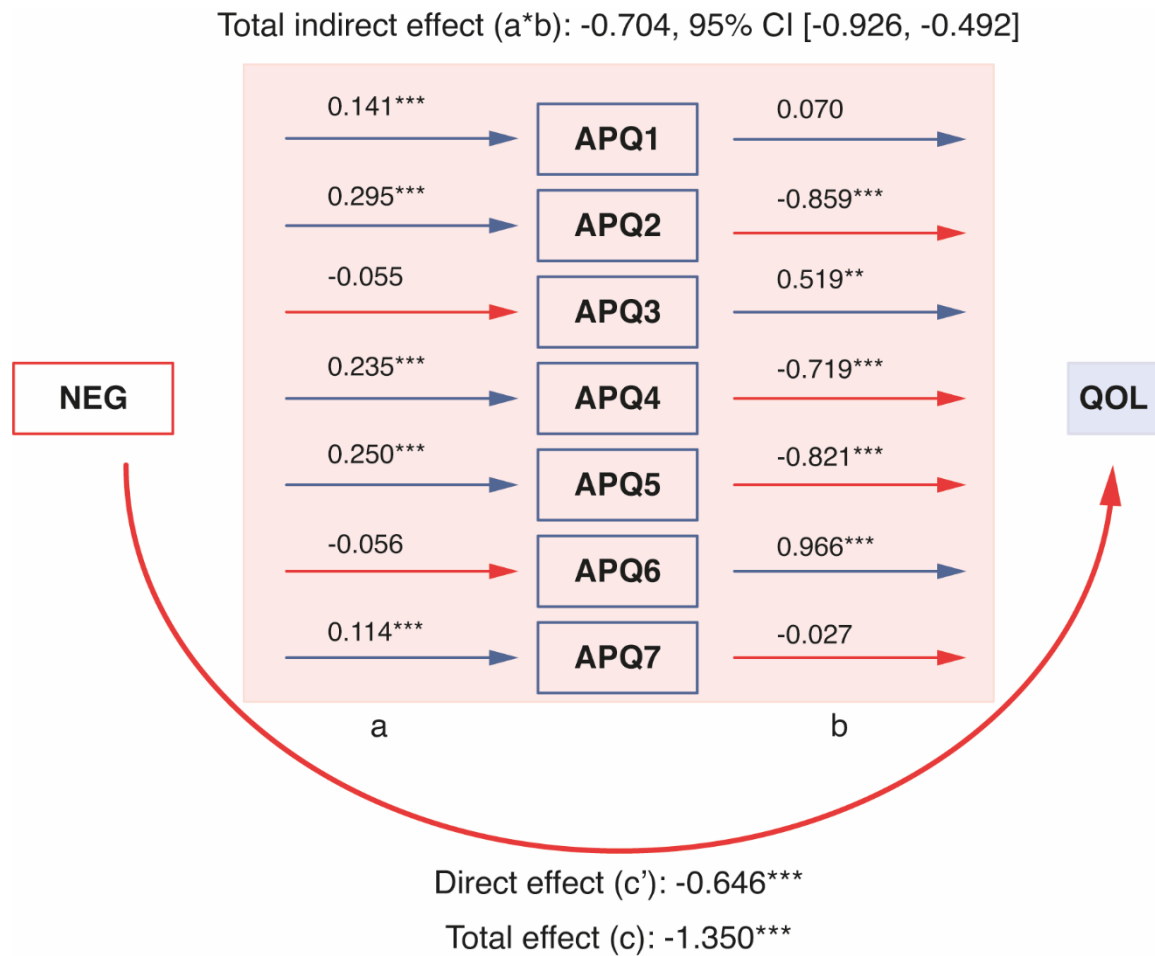

**Figure S2.** Mediation Diagram for the Relationship Between Negative (NEG) Perceived Ageism and Quality of Life (QOL) as Mediated by Self-perceptions of Aging (APQ)

Note. Values represent unstandardized regression coefficients. \* $p < .05$ , \*\* $p < .01$ , \*\*\* $p < .001$

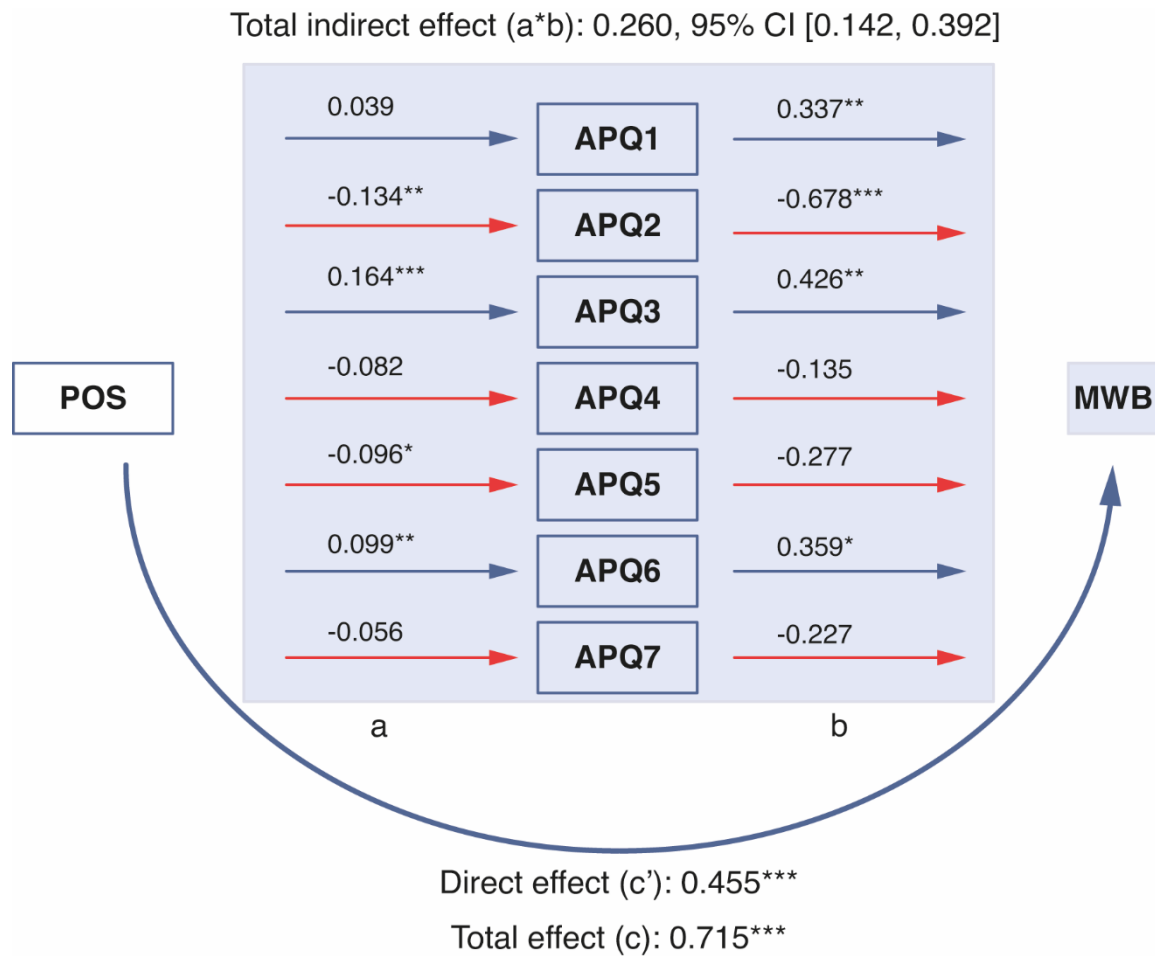

**Figure S3.** Mediation Diagram for the Relationship Between Positive (POS) Perceived Ageism and Mental Well-being (MWB) as Mediated by Self-perceptions of Aging (APQ)

Note. Values represent unstandardized regression coefficients. \* $p < .05$ , \*\* $p < .01$ , \*\*\* $p < .001$

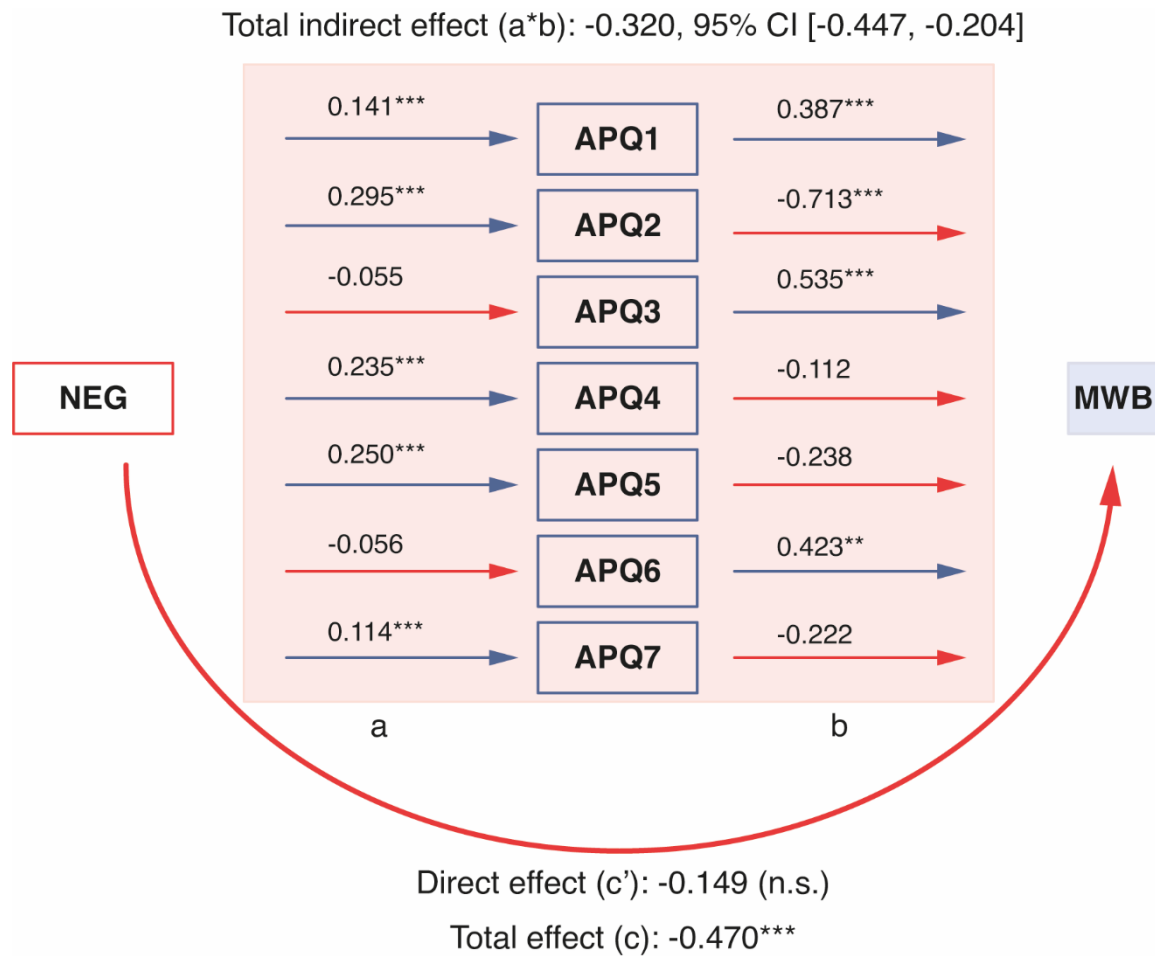

**Figure S4.** Mediation Diagram for the Relationship Between Negative (NEG) Perceived Ageism and Mental Well-being (MWB) as Mediated by Self-perceptions of Aging (APQ)

Note. Values represent unstandardized regression coefficients. \* $p < .05$ , \*\* $p < .01$ , \*\*\* $p < .001$

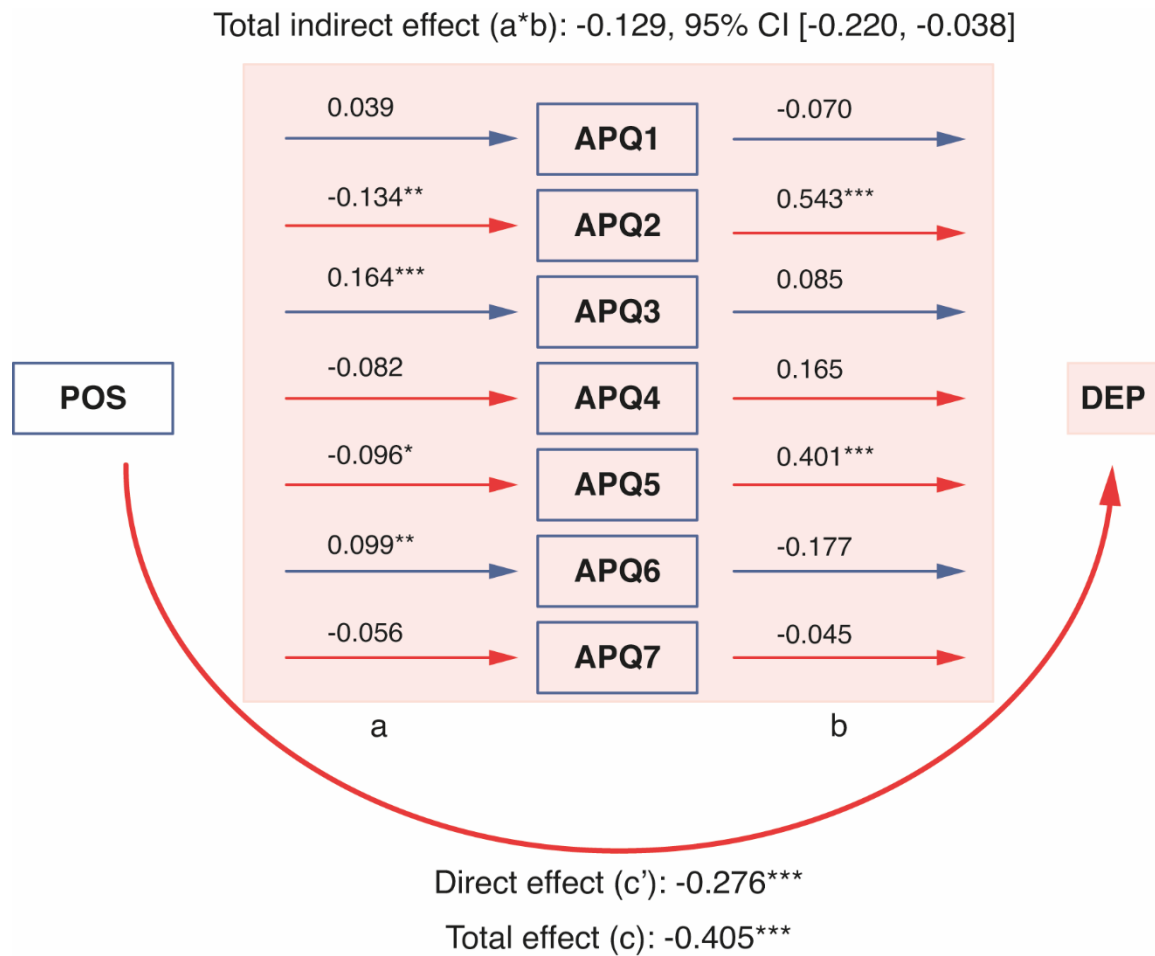

**Figure S5.** Mediation Diagram for the Relationship Between Positive (POS) Perceived Ageism and Depression (DEP) as Mediated by Self-perceptions of Aging (APQ)

Note. Values represent unstandardized regression coefficients. \* $p < .05$ , \*\* $p < .01$ , \*\*\* $p < .001$

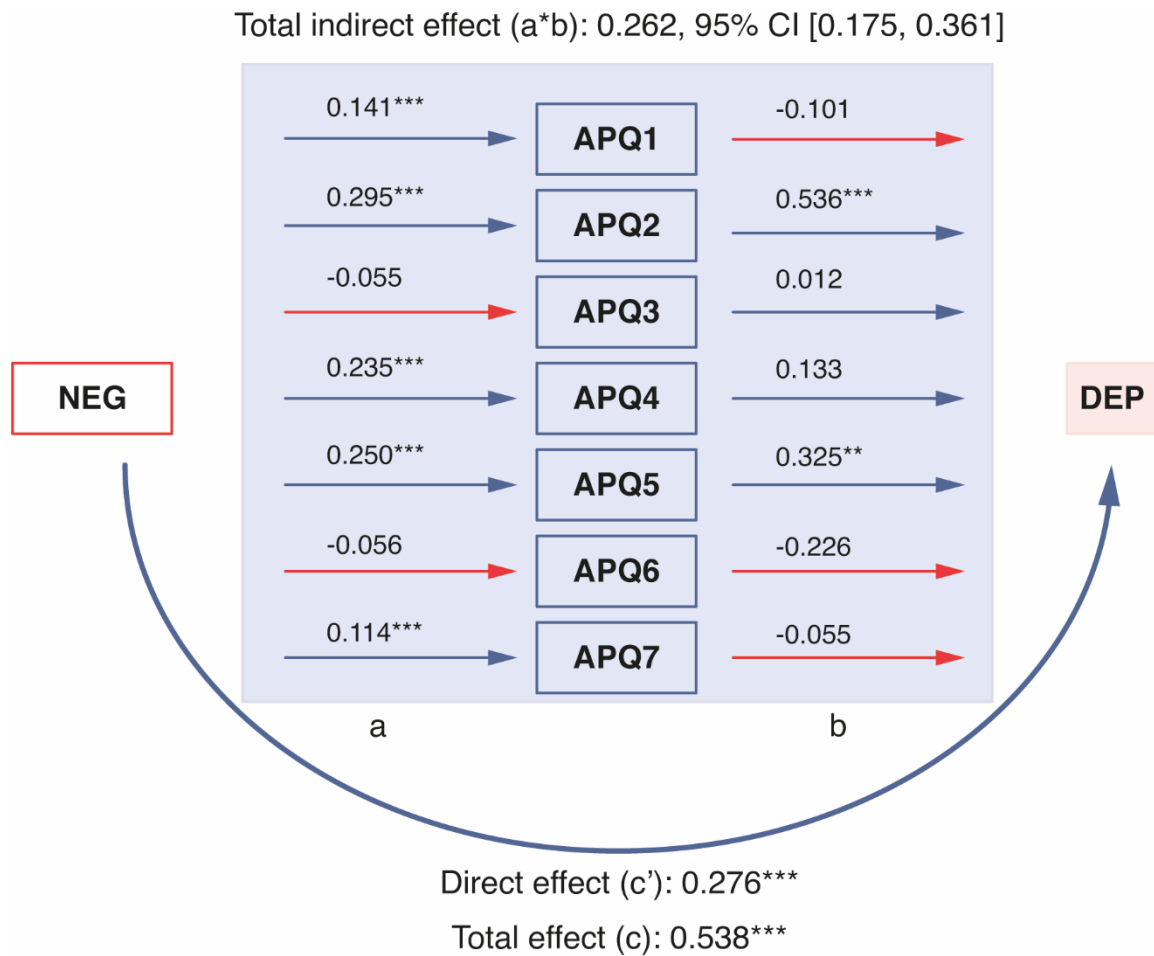

**Figure S6.** Mediation Diagram for the Relationship Between Negative (NEG) Perceived Ageism and Depression (DEP) as Mediated by Self-perceptions of Aging (APQ)

Note. Values represent unstandardized regression coefficients. \* $p < .05$ , \*\* $p < .01$ , \*\*\* $p < .001$

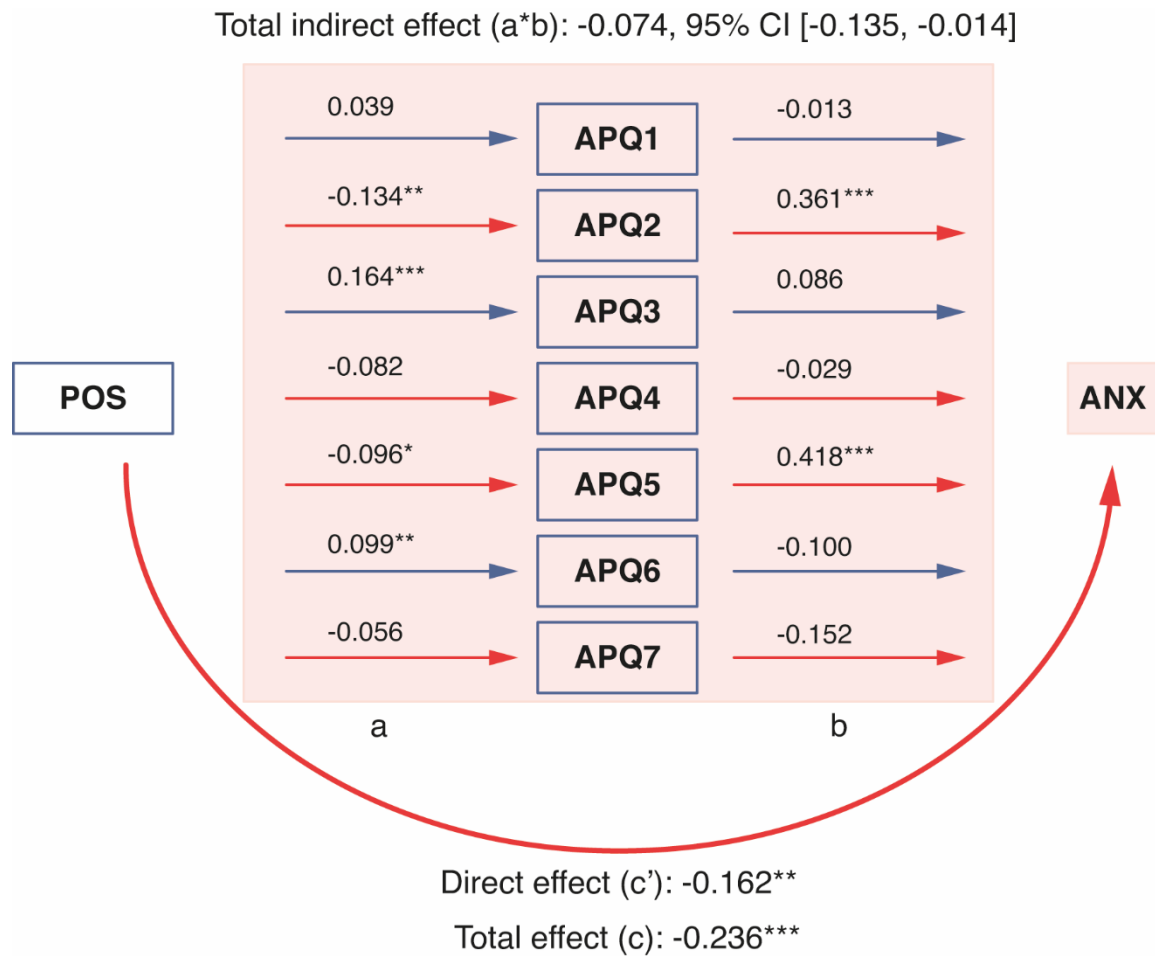

**Figure S7.** Mediation Diagram for the Relationship Between Positive (POS) Perceived Ageism and Anxiety (ANX) as Mediated by Self-perceptions of Aging (APQ)

Note. Values represent unstandardized regression coefficients. \* $p < .05$ , \*\* $p < .01$ , \*\*\* $p < .001$



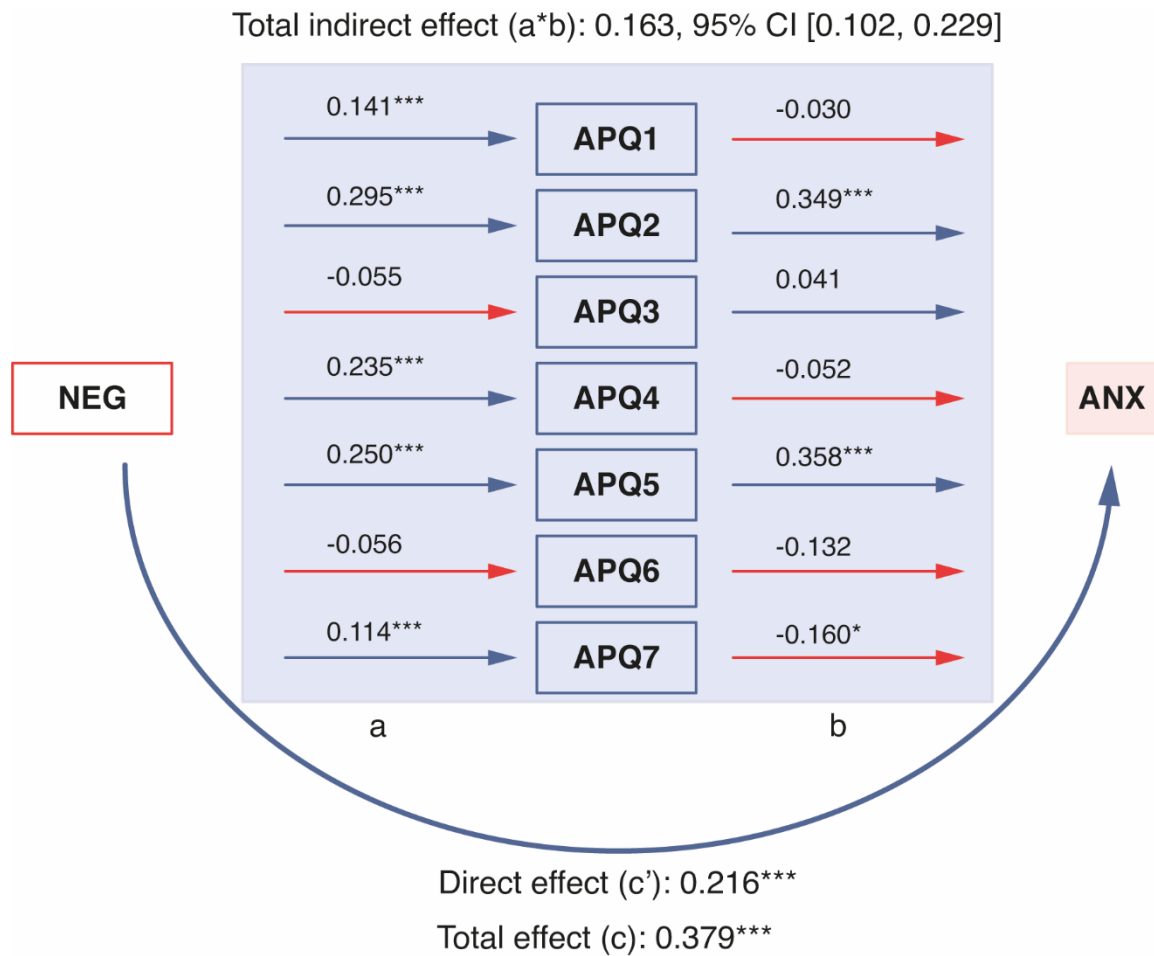

**Figure S8.** Mediation Diagram for the Relationship Between Negative (NEG) Perceived Ageism and Anxiety (ANX) as Mediated by Self-perceptions of Aging (APQ)

Note. Values represent unstandardized regression coefficients. \* $p < .05$ , \*\* $p < .01$ , \*\*\* $p < .001$

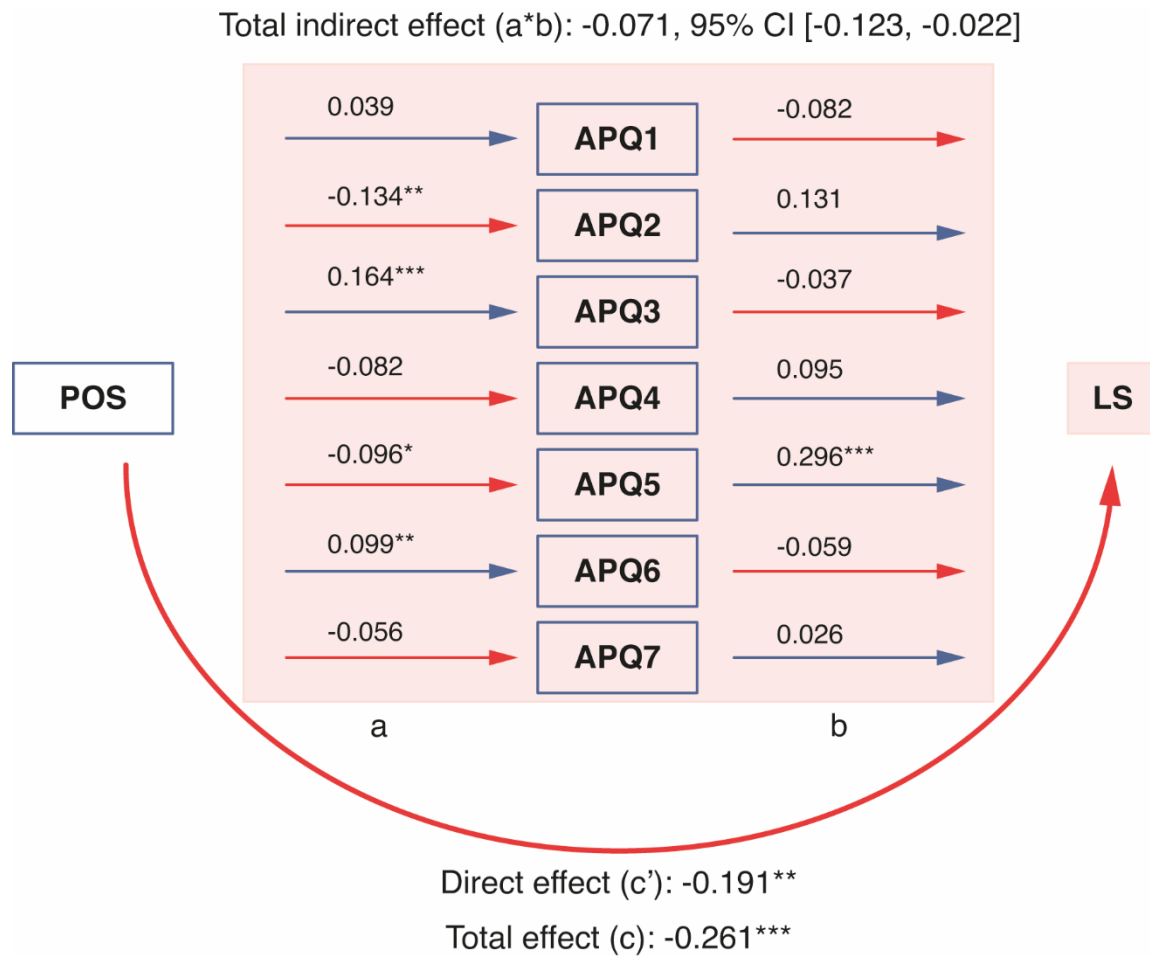

**Figure S9.** Mediation Diagram for the Relationship Between Positive (POS) Perceived Ageism and Loneliness (LS) as Mediated by Self-perceptions of Aging (APQ)

Note. Values represent unstandardized regression coefficients. \* $p < .05$ , \*\* $p < .01$ , \*\*\* $p < .001$

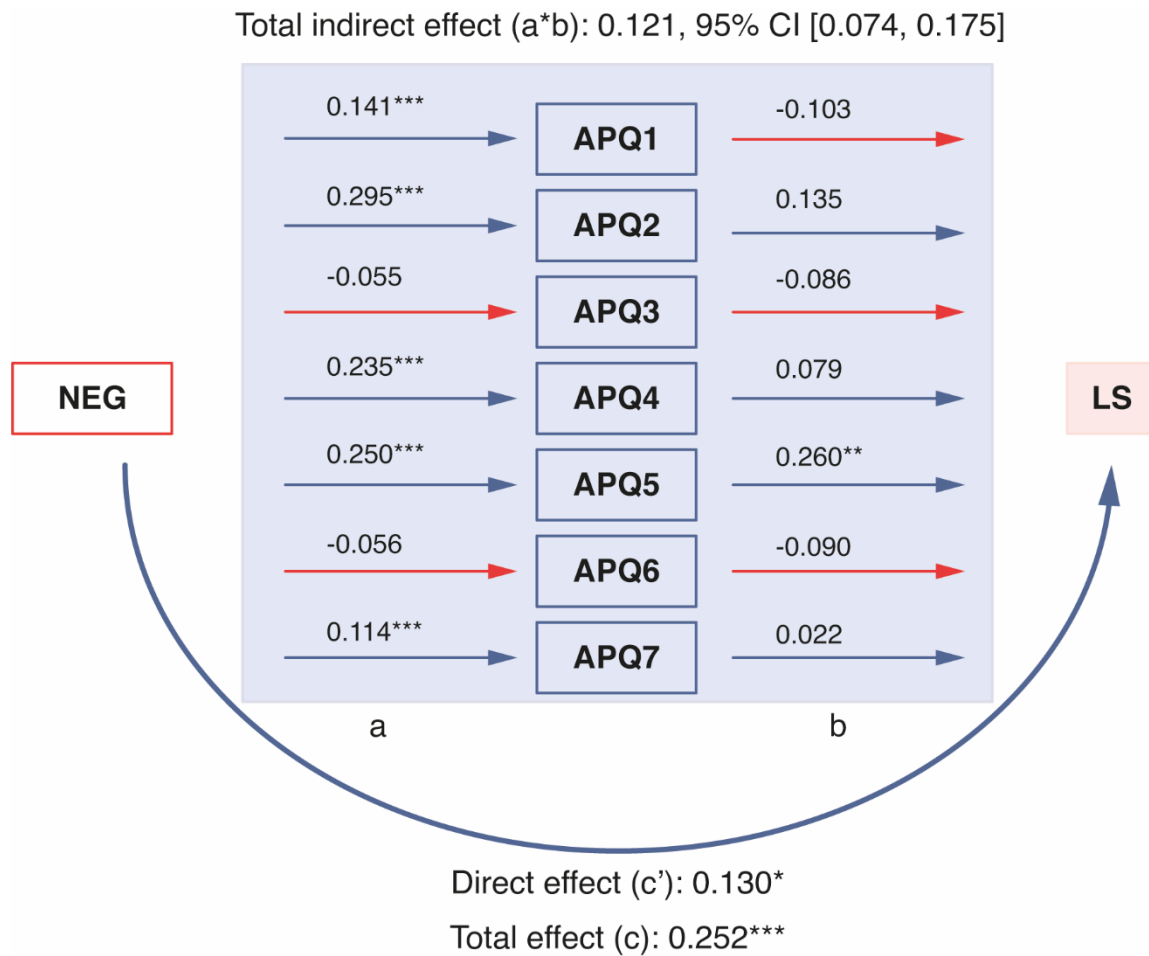

**Figure S10.** Mediation Diagram for the Relationship Between Negative (NEG) Perceived Ageism and Loneliness (LS) as Mediated by Self-perceptions of Aging (APQ)

Note. Values represent unstandardized regression coefficients. \* $p < .05$ , \*\* $p < .01$ , \*\*\* $p < .001$

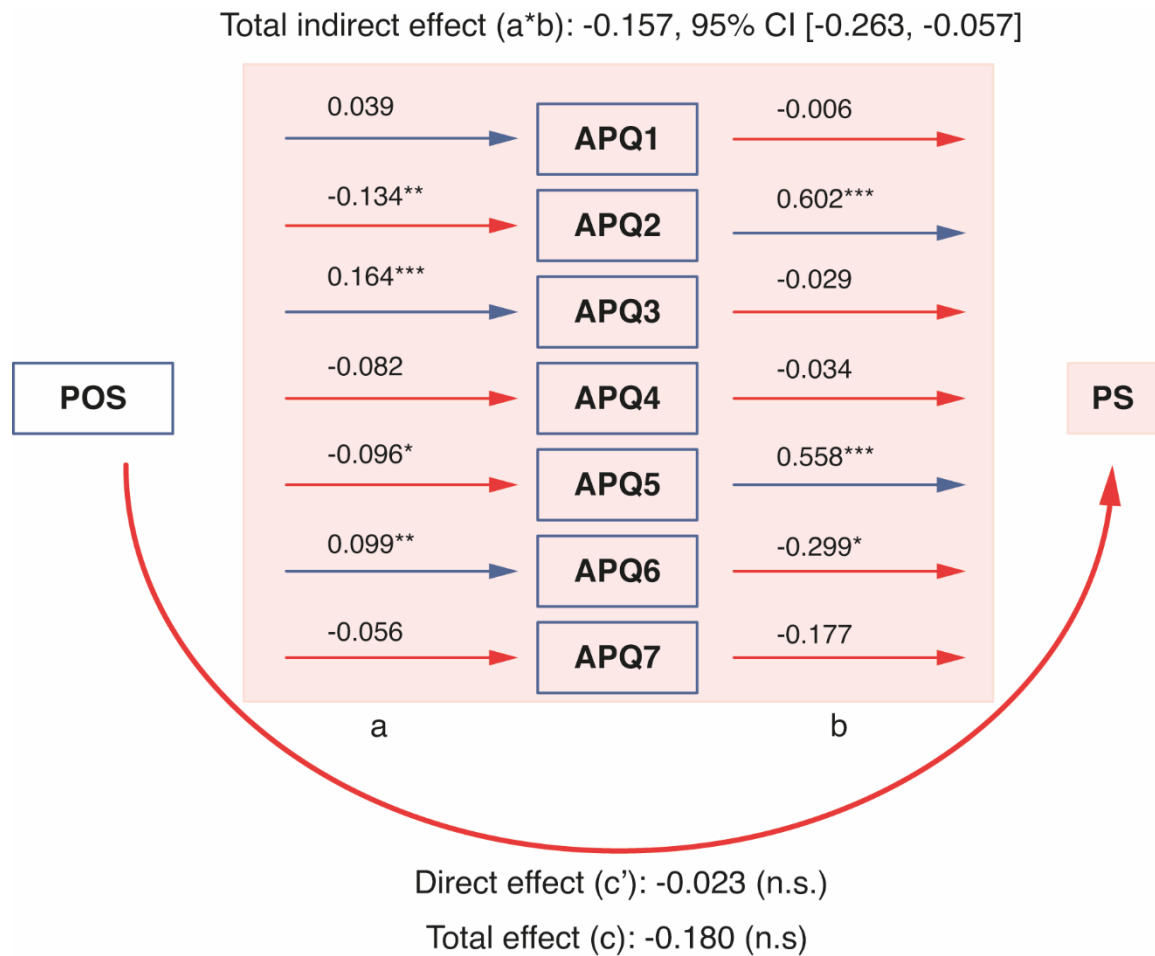

**Figure S11.** Mediation Diagram for the Relationship Between Positive (POS) Perceived Ageism and Perceived Stress (PS) as Mediated by Self-perceptions of Aging (APQ)

Note. Values represent unstandardized regression coefficients. \* $p < .05$ , \*\* $p < .01$ , \*\*\* $p < .001$

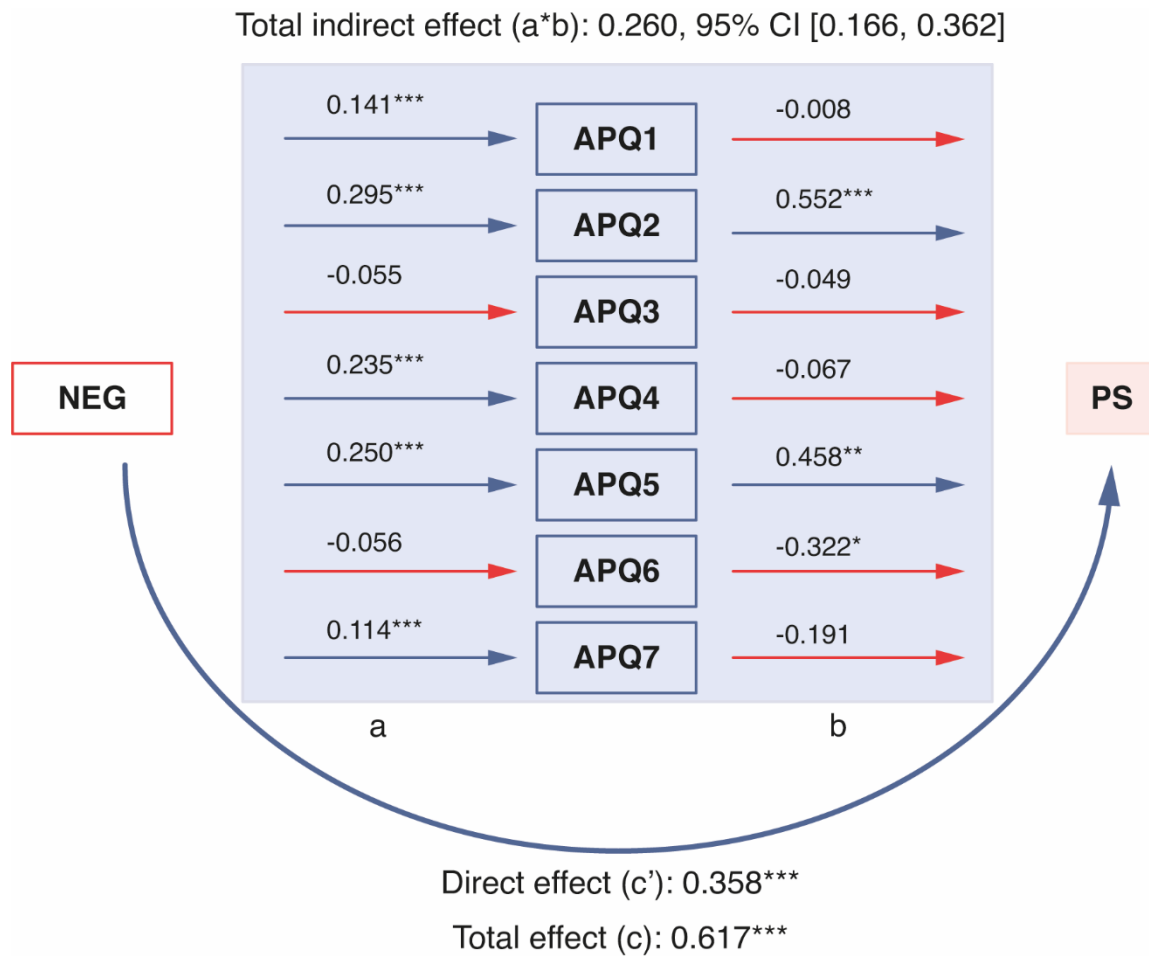

**Figure S12.** Mediation Diagram for the Relationship Between Negative (NEG) Perceived Ageism and Perceived Stress (PS) as Mediated by Self-perceptions of Aging (APQ)

Note. Values represent unstandardized regression coefficients. \* $p < .05$ , \*\* $p < .01$ , \*\*\* $p < .001$

**Table S4.** Direct and indirect effects, via self-perceptions of aging, of the mediation models.

|                   |          | NEG (r)   |       |                | POS (r)   |       |                |
|-------------------|----------|-----------|-------|----------------|-----------|-------|----------------|
|                   |          | B         | SE    | 95% CI         | B         | SE    | 95% CI         |
| Depression        | Direct   | 0.309***  | 0.087 | [0.14, 0.48]   | -0.313*** | 0.083 | [-0.47, -0.15] |
|                   | Indirect | 0.253     | 0.047 | [0.17, 0.35]   | -0.129    | 0.041 | [-0.21, -0.05] |
| Anxiety           | Direct   | 0.236***  | 0.068 | [0.11, 0.37]   | -0.190**  | 0.061 | [-0.31, -0.07] |
|                   | Indirect | 0.157     | 0.031 | [0.10, 0.22]   | -0.072    | 0.028 | [-0.13, -0.02] |
| Loneliness        | Direct   | 0.152**   | 0.052 | [0.05, 0.26]   | -0.209*** | 0.057 | [-0.32, -0.10] |
|                   | Indirect | 0.114     | 0.025 | [0.07, 0.17]   | -0.070    | 0.023 | [-0.12, -0.03] |
| Perceived stress  | Direct   | 0.365***  | 0.097 | [0.18, 0.56]   | -0.067    | 0.099 | [-0.26, 0.13]  |
|                   | Indirect | 0.265     | 0.050 | [0.17, 0.36]   | -0.155    | 0.047 | [-0.26, -0.07] |
| Quality of Life   | Direct   | -0.678*** | 0.135 | [-0.95, -0.42] | 0.299     | 0.153 | [-0.01, 0.59]  |
|                   | Indirect | -0.714    | 0.103 | [-0.92, -0.51] | 0.463     | 0.114 | [0.24, 0.69]   |
| Mental well-being | Direct   | -0.200    | 0.104 | [-0.40, 0.00]  | 0.479***  | 0.106 | [0.27, 0.69]   |
|                   | Indirect | -0.311    | 0.056 | [-0.42, -0.21] | 0.270     | 0.059 | [0.16, 0.39]   |

*Note.* NEG: perceived negative ageism subscale, POS: perceived positive ageism subscale. B represents unstandardized regression weights. Square brackets are used to enclose the lower and upper limits of a confidence interval (CI). Outcomes are derived from a path-analysis, including all paths of interest, estimated with Maximum Likelihood. \* $p < .05$ , \*\* $p < .01$ , \*\*\* $p < .001$
